# Supplementary material for: Substituent-dependent backward reaction in mechanofluorochromism of dibenzoylmethanatoboron difluoride derivatives
Source: Royal Society of Chemistry journal article supplement (doi:10.1039/c5pp00453e), 2016-02-11
Supplement: c5pp00453e1.pdf [file c5pp00453e1.pdf]

Electronic Supplementary Information:

## Substituent-Dependent Backward Reaction in Mechanofluorochromism of Dibenzoylmethanoboron Difluoride Derivative

Takehiro Sagawa, Fuyuki Ito,\* Atsushi Sakai, Yudai Ogata, Keiji Tanaka and Hiroshi Ikeda

**Table 1** The rate constants of thermally backward reaction of BF<sub>2</sub>DBM derivatives observed in various temperature obtained by non-linear least square fitting.

| Temperature /<br>K | Rate constant / min <sup>-1</sup><br>(Pre-exponential factor) |                  |                   |                  |                   |                  |                   |                  |                   |                   |
|--------------------|---------------------------------------------------------------|------------------|-------------------|------------------|-------------------|------------------|-------------------|------------------|-------------------|-------------------|
|                    | abBF <sub>2</sub>                                             |                  | 2aBF <sub>2</sub> |                  | 2bBF <sub>2</sub> |                  | 2cBF <sub>2</sub> |                  | 2dBF <sub>2</sub> |                   |
|                    | Faster                                                        | Slower           | Faster            | Slower           | Faster            | Slower           | Faster            | Slower           | Faster            | Slower            |
| 288                |                                                               |                  | 0.145<br>(0.48)   | 0.0124<br>(0.49) |                   |                  |                   |                  |                   |                   |
| 293                |                                                               |                  |                   |                  | 0.125<br>(0.50)   | 0.0136<br>(0.43) |                   |                  |                   |                   |
| 295                |                                                               |                  | 0.202<br>(0.76)   | 0.0195<br>(0.18) |                   |                  |                   |                  |                   |                   |
| 296                | 0.484<br>(0.55)                                               | 0.0302<br>(0.44) |                   |                  |                   |                  |                   |                  |                   |                   |
| 298                |                                                               |                  |                   |                  |                   |                  | 0.207<br>(0.83)   | 0.0343<br>(0.08) | 0.0599<br>(0.37)  | 0.00249<br>(0.33) |
| 303                | 1.02<br>(0.79)                                                | 0.0386<br>(0.17) | 0.353<br>(0.58)   | 0.0305<br>(0.36) | 0.168<br>(0.54)   | 0.0196<br>(0.36) | 0.240<br>(0.79)   | 0.0390<br>(0.17) | 0.0763<br>(0.71)  | 0.00317<br>(0.19) |
| 308                |                                                               |                  | 0.483<br>(0.37)   | 0.0389<br>(0.54) |                   |                  | 0.271<br>(0.52)   | 0.0451<br>(0.39) |                   |                   |
| 313                | 1.35<br>(0.84)                                                | 0.0473<br>(0.14) |                   |                  | 0.203<br>(0.65)   | 0.0247<br>(0.33) | 0.299<br>(0.72)   | 0.0525<br>(0.19) | 0.105<br>(0.49)   | 0.00433<br>(0.21) |
| 318                |                                                               |                  | 0.785<br>(0.03)   | 0.0444<br>(0.86) |                   |                  | 0.369<br>(0.32)   | 0.0624<br>(0.57) |                   |                   |
| 323                | 1.83<br>(0.60)                                                | 0.0583<br>(0.40) |                   |                  | 0.315<br>(0.56)   | 0.0283<br>(0.36) |                   |                  | 0.138<br>(0.27)   | 0.00517<br>(0.38) |
| 333                | 5.11<br>(0.50)                                                | 0.117<br>(0.43)  |                   |                  | 0.379<br>(0.65)   | 0.0320<br>(0.26) |                   |                  | 0.184<br>(0.41)   | 0.00754<br>(0.35) |
